# Supplementary material for: Clinical significance of early kinetics of C‑reactive protein in patients with advanced urothelial carcinoma treated with pembrolizumab: Flare response and baseline levels predict oncological outcomes
Source: PubMed Central journal article supplement — Oncol Lett. 2024 Oct 11;28(6):603. doi: 10.3892/ol.2024.14736 (PMC11544533; doi:10.3892/ol.2024.14736), 2024-10-11
Supplement: Supplementary_Data.pdf [file Supplementary_Data.pdf]

Table SI. Patient characteristics of CRP flare-responders stratified by BL CRP levels.

| Characteristic                      | Flare-responder high BL | Flare-responder low BL |
|-------------------------------------|-------------------------|------------------------|
| Number of patients                  | 9                       | 8                      |
| Median age, years (IQR)             | 74 (64–86)              | 76 (67–83)             |
| Sex, n (%)                          |                         |                        |
| Male                                | 5 (56)                  | 6 (75)                 |
| Female                              | 4 (44)                  | 2 (25)                 |
| Median BMI, kg/m <sup>2</sup> (IQR) | 21.0 (17.5–25.7)        | 20.5 (18.5–28.6)       |
| ECOG-PS, n (%)                      |                         |                        |
| 0                                   | 4 (44)                  | 6 (75)                 |
| 1                                   | 5 (56)                  | 2 (25)                 |
| Primary lesion (%)                  |                         |                        |
| Upper tract                         | 5 (56)                  | 4 (50)                 |
| Bladder                             | 3 (33)                  | 4 (50)                 |
| Both                                | 1 (11)                  | 0 (0)                  |
| Histological grade, n (%)           |                         |                        |
| G2                                  | 1 (11)                  | 2 (25)                 |
| G2>G3                               | 1 (11)                  | 1 (13)                 |
| G3>G2                               | 1 (11)                  | 0 (0)                  |
| G3                                  | 6 (67)                  | 5 (63)                 |
| Histologic type, n (%)              |                         |                        |
| Pure UC                             | 8 (89)                  | 6 (75)                 |
| Squamous differentiation            | 0 (0)                   | 1 (13)                 |
| Glandular differentiation           | 0 (0)                   | 1 (13)                 |
| Plasmacytoid subtype                | 1 (11)                  | 0 (0)                  |
| Hemoglobin, n (%)                   |                         |                        |
| ≥10 g/dl                            | 3 (33)                  | 7 (88)                 |
| <10 g/dl                            | 6 (67)                  | 1 (12)                 |
| Liver metastasis (%)                |                         |                        |
| Absence                             | 8 (89)                  | 7 (88)                 |
| Presence                            | 1 (11)                  | 1 (12)                 |
| Prior treatment line, n (%)         |                         |                        |
| 1                                   | 8 (89)                  | 8 (100)                |
| ≥2                                  | 1 (11)                  | 0 (0)                  |
| Radical surgery, n (%)              |                         |                        |
| Absence                             | 5 (56)                  | 2 (25)                 |

|                                     |                  |                  |
|-------------------------------------|------------------|------------------|
| Presence                            | 4 (44)           | 6 (75)           |
| Time from prior chemotherapy, n (%) |                  |                  |
| $\geq 3$ months                     | 1 (11)           | 7 (88)           |
| <3 months                           | 8 (89)           | 1 (12)           |
| Median BL CRP, g/dl (IQR)           | 2.00 (1.32–4.20) | 0.20 (0.12–0.21) |

---

BL, baseline; IQR, interquartile range; BMI, body mass index; ECOG, Eastern Cooperative Oncology Group; PS, performance status; UC, urothelial carcinoma; CRP, C-reactive protein.

---
